# Supplementary material for: Three dimensional nanocomposite of reduced graphene oxide and hexagonal boron nitride as an efficient metal-free catalyst for oxygen electroreduction
Source: Royal Society of Chemistry journal article supplement (doi:10.1039/c6ta00525j), 2016-01-01
Supplement: c6ta00525j1.pdf [file c6ta00525j1.pdf]

## Supporting Information

### Three Dimensional Nanocomposite of Reduced Graphene Oxide and Hexagonal Boron Nitride as an Efficient Metal-Free Catalyst for Oxygen Electroreduction

Indrajit M. Patil, Moorthi Lokanathan and Bhalchandra Kakade\*

SRM Research Institute, Department of Chemistry, SRM University, Kattankulathur – 603 203,  
Chennai (India),

Fax: (+91) 44-2745 6702; Tel: (+91) 44-2741 7920.

\*Corresponding author E-mail: [bhalchandrakakade.a@res.srmuniv.ac.in](mailto:bhalchandrakakade.a@res.srmuniv.ac.in)

#### Experimental Details:

##### (a) Synthesis of Graphene Oxide (GO)

Graphene oxide was synthesized using a modified Hummer's method [49]. Briefly, 2.0 g graphite powder and 1.0 g NaNO<sub>3</sub> were mixed with 46 mL concentrated H<sub>2</sub>SO<sub>4</sub>. Afterwards, above mixture stirred together for 30 minutes and at vigorous condition 6.0 g KMnO<sub>4</sub> was slowly added under ice bath to prevent the temperature below the room temperature. Next, the mixtures was stirred and held at 35°C for 30 minute. Then 92 mL de-ionized water (DI) water was slowly added into system. Again stir the solution for 15 minute, after that 80 mL warm DI water was added. To reduce excess KMnO<sub>4</sub>, a proper amount of 3% H<sub>2</sub>O<sub>2</sub> aqueous solution was dropped into reaction until no bubbles were observed. The obtained mixture was centrifuged and the product was washed with 5% HCl to remove the residual metal impurities and finally with DI water up to neutral pH. As synthesized GO was collected by using freeze-drying.

**Table S1. Comparison of experimental conditions, ORR activities and onset potentials for graphene based electrocatalysts**

| Catalyst                           | Preparation Method Used       | Electrolyte                          | Reference electrode employed | Onset Potential (V vs RHE) <sup>a</sup> | Kinetic current density at 1600 rpm (mA cm <sup>-2</sup> ) <sup>a</sup> | References |
|------------------------------------|-------------------------------|--------------------------------------|------------------------------|-----------------------------------------|-------------------------------------------------------------------------|------------|
| Cu <sub>3</sub> N@CNT              | Atomic layer deposition (ALD) | 0.1 M KOH                            | Hg/HgO                       | 0.66                                    | N/A                                                                     | 15         |
| CoP-nanocrystals                   | Hydrothermal                  | 0.1 M KOH                            | RHE                          | 0.80                                    | N/A                                                                     | 16         |
| Chemically drilled MWNT            | Chemical drilling             | 0.1 M HClO <sub>4</sub>              | RHE                          | 0.73                                    | 1.1 (@ 0.2 V)                                                           | 17         |
| TDMAC-reduced graphene oxide       | Physiochemical process        | 0.1 M KOH                            | Ag/AgCl                      | 0.76                                    | 2.7 (@ -0.2 V)                                                          | 18         |
| N, S co-doped carbon               | CO impregnation               | 0.1 M KOH                            | Ag/AgCl                      | 0.83                                    | 2.3 (@ 0.3 V)                                                           | 19         |
| N, P, S-tridoped graphene          | Thermal annealing             | 0.1 M KOH                            | SCE                          | 0.68                                    | N/A                                                                     | 20         |
| N doped-reduced graphene oxide     | Ultrasonochemical             | 0.1 M KOH                            | NHE                          | 0.87                                    | 2.0 (@ 0.2 V)                                                           | 21         |
| rGO/Co <sub>3</sub> O <sub>4</sub> | One-pot reaction              | 0.1 M KOH                            | Hg/HgO                       | 0.72                                    | N/A                                                                     | 22         |
| Xerogel carbon/PANFe               | Pyrolysis                     | 0.1 M H <sub>2</sub> SO <sub>4</sub> | NHE                          | 0.67                                    | N/A                                                                     | 23         |
| C-N/ graphene compo.               | Carbonization of polypyrrole  | 0.1 M KOH                            | Ag/AgCl                      | 0.80                                    | N/A                                                                     | 24         |
| Py-N doped graphene                | CVD                           | 0.1 M KOH                            | Ag/AgCl                      | 0.80                                    | N/A                                                                     | 25         |
| X-graph. nanoplatelets             | Ball milling                  | 0.1 M KOH                            | Ag/AgCl                      | 0.83                                    | N/A                                                                     | 26         |

|                                                     |                            |                                      |                |              |                      |                      |
|-----------------------------------------------------|----------------------------|--------------------------------------|----------------|--------------|----------------------|----------------------|
| N-doped graphene film                               | Organic synthesis route    | 0.1 M KOH                            | Ag/AgCl        | 0.86         | 1.1 (@ 0.2 V)        | 27                   |
| N-doped graphene oxide                              | Hydrothermal               | 0.1 M KOH                            | Ag/AgCl        | 0.79         | N/A                  | 28                   |
| N-doped graphene oxide                              | Hydrothermal               | 0.1 M KOH                            | SCE            | 0.80         | N/A                  | 29                   |
| B,N doped graphene quantum dots/graphene nanoplates | CVD                        | 0.1 M KOH                            | Ag/AgCl        | 0.998        | 4.5 (@ 0.2 V)        | 30                   |
| B/N substituted carbon ribbons                      | Thermal reduction          | 0.1 M KOH                            | Ag/AgCl        | 1.00         | 3.5 (@ 0.2 V)        | 31                   |
| h-BN nanosheets supported on Au                     | Spin coating               | 0.5 M H <sub>2</sub> SO <sub>4</sub> | Ag/AgCl        | 0.70         | 1.6 (@ 0.2 V)        | 47                   |
| <b>rGO/BN composite</b>                             | <b>Hydrothermal method</b> | <b>0.1 M KOH</b>                     | <b>Ag/AgCl</b> | <b>0.798</b> | <b>3.0 (@ 0.2 V)</b> | <b>Present study</b> |

<sup>(a)</sup> All potential have been mentioned against reversible hydrogen electrode (RHE) using standard conversion factor.

**Figure S1. SEM image comparison of rGO/BN catalyst**

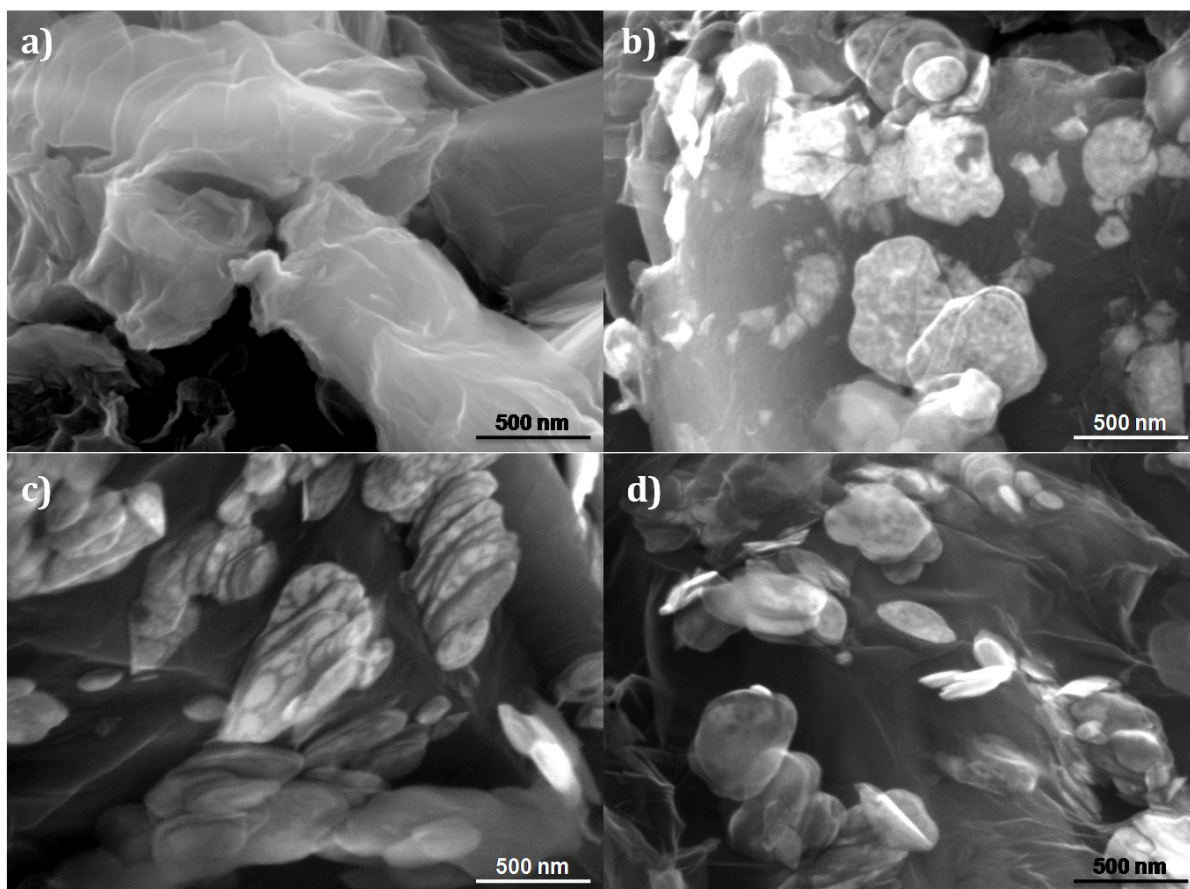

**Figure S1.** (a-d) A typical SEM images comparison of GO-750, GOBN3-750, GOBN7-750 and GOBN10-750 respectively.

**Table S2. Comparison of ORR activities of various electrocatalysts**

| <b>Catalyst</b>  | <b>Onset (V vs RHE)</b> | <b>E<sub>1/2</sub> (V vs RHE)</b> | <b>Mass activity (mA/mg)</b> |
|------------------|-------------------------|-----------------------------------|------------------------------|
| GO-750           | 0.73                    | 0.57                              | 40.12                        |
| GOBN3-750        | 0.725                   | 0.52                              | 48.98                        |
| <b>GOBN5-750</b> | <b>0.798</b>            | <b>0.64</b>                       | <b>155.46</b>                |
| GOBN7-750        | 0.72                    | 0.51                              | 39.9                         |
| GOBN10-750       | 0.74                    | 0.59                              | 60.79                        |
| Comm. Pt/C       | 1.0                     | 0.88                              | 227.4 (at 0.9 V)             |

**Table S2.** The onset potential, half wave potential (V vs RHE) and mass activity (mA/mg) comparison of various rGO/BN nanocomposite catalyst with commercial Pt/C (20 wt %).

**Figure S2.** SEM image of GOBN composite

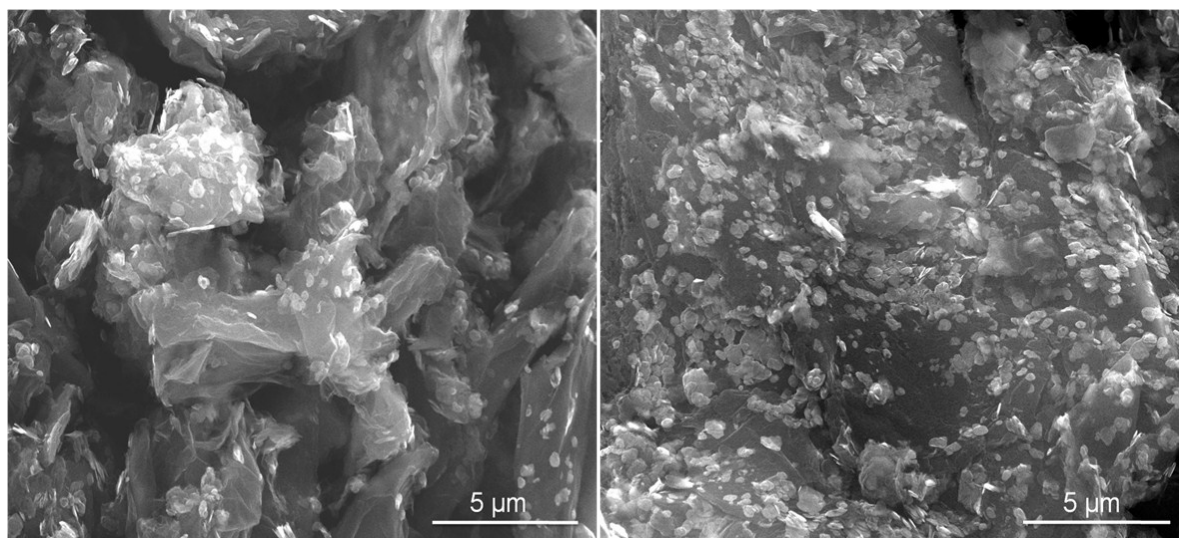

**Figure S2.** A low-magnification SEM image comparison of GOBN5 nanocomposite, before (left) and after (right) heat treatment at 750°C.

**Figure S3.** RRDE studies for GOBN5-750 catalyst

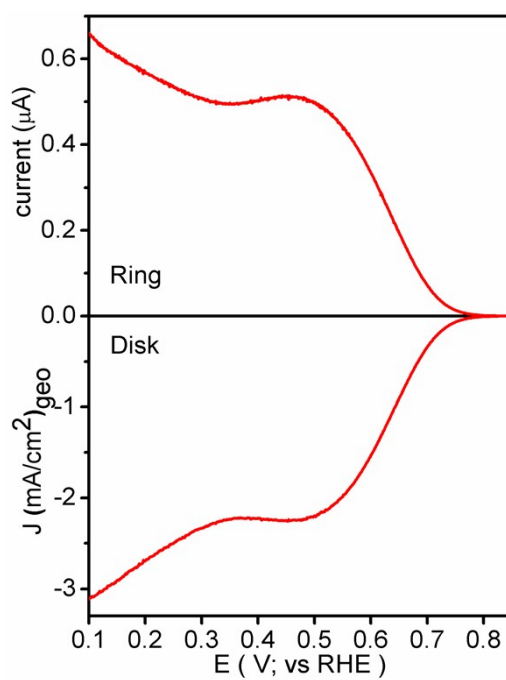

**Figure S3.** Disk current (bottom) and the corresponding ring current (top) for GOBN5-750 catalyst using RRDE at 1600 rpm in  $\text{O}_2$ -saturated 0.1 M KOH solution; (geo: geometric current density, sweep rate 10 mV/s).

**Figure S4. Comparative ORR polarization curves for different rGO/BN catalysts with at various rotating speed**

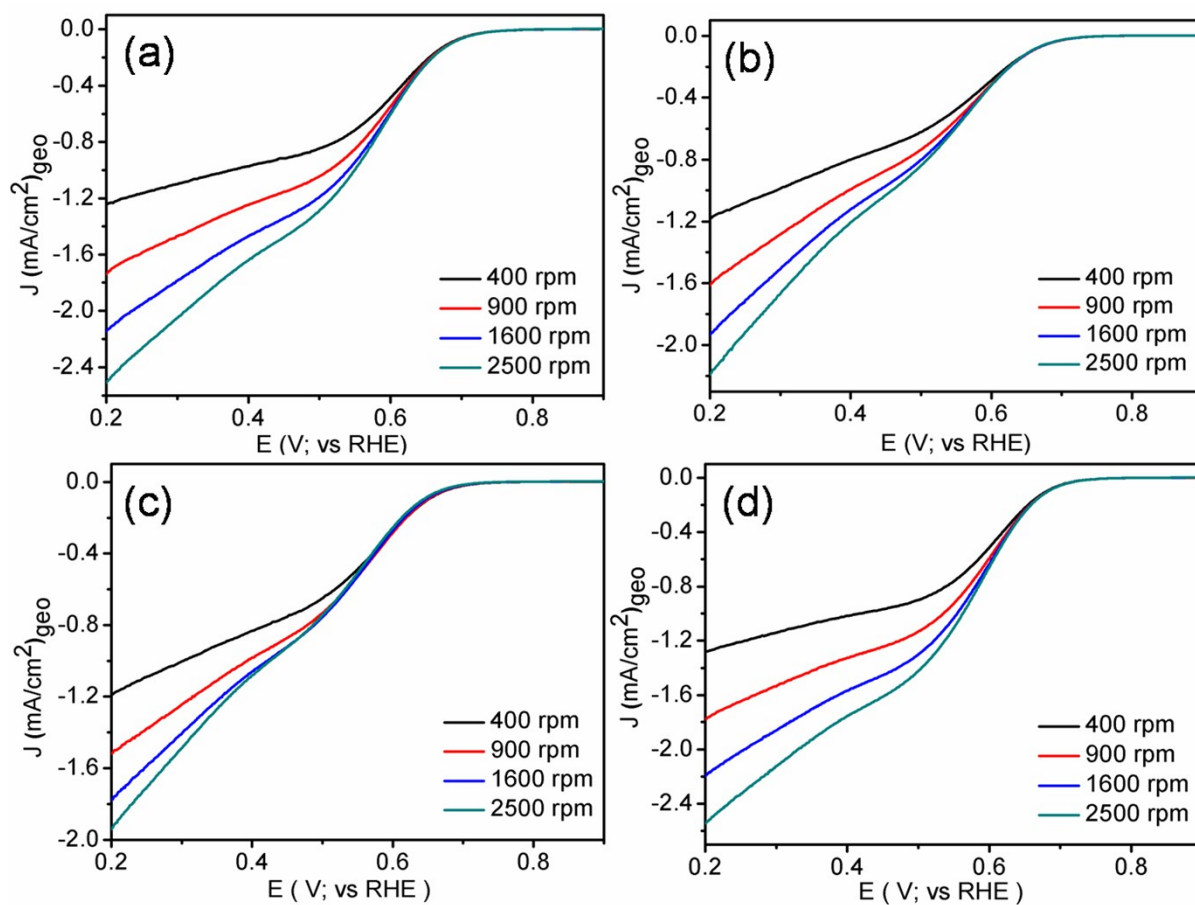

**Figure S4.** ORR polarization curves for (a) GO-750, (b) GOBN3-750, (c) GOBN7-750 and (d) GOBN10-750, in presence of O<sub>2</sub>-saturated 0.1 M KOH at 25°C. (geo: geometric current density, sweep rate 10 mV/s).

**Figure S5. Morphology comparison of GOBN5-750 catalyst after durability test**

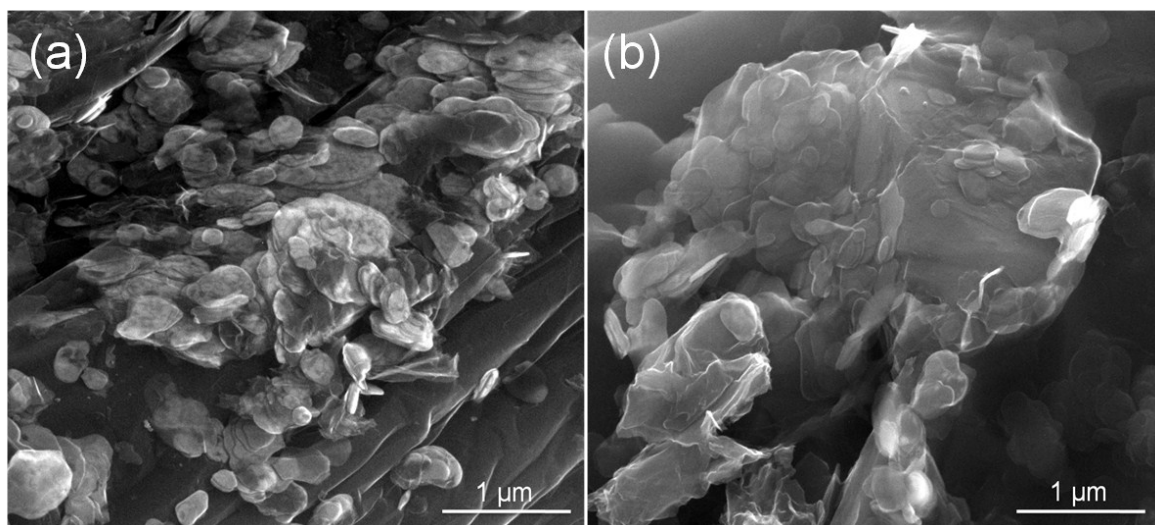

**Figure S5.** Comparative SEM images of GOBN5-750 electrocatalyst (a) before and (b) after durability test at 10000 cycles.
